# Supplementary material
Source: PubMed Central journal article supplement (PMC8237745)
Supplement: NIHMS1703174-supplement-appendix.pdf [file NIHMS1703174-supplement-appendix.pdf]

## Appendix. Sensitivity Analysis Comparing Thresholds for Extreme Values in Calculation of Standardized Cost

| Group             | Hospital Median (\$)<br>(25 <sup>th</sup> -75 <sup>th</sup> Percentile) | Percent<br>Difference in<br>Median | Coefficient of<br>Variation (CV)<br>(%) | Percent<br>Difference in<br>CV (%) |
|-------------------|-------------------------------------------------------------------------|------------------------------------|-----------------------------------------|------------------------------------|
| Overall           |                                                                         |                                    |                                         |                                    |
| 10-fold threshold | 48,696 (42,642-55,610)                                                  |                                    | 19.9%                                   |                                    |
| 3-fold threshold  | 50,240 (43,954-57,425)                                                  | 3.2%                               | 20.0%                                   | 0.7%                               |
| STAT 1            |                                                                         |                                    |                                         |                                    |
| 10-fold threshold | 31,739 (27,834-36,191)                                                  |                                    | 19.7%                                   |                                    |
| 3-fold threshold  | 33,052 (29,149-37,478)                                                  | 4.1%                               | 18.8%                                   | 4.4%                               |
| STAT 2            |                                                                         |                                    |                                         |                                    |
| 10-fold threshold | 44,072 (38,505-50,444)                                                  |                                    | 20.2%                                   |                                    |
| 3-fold threshold  | 45,668 (39,827-52,366)                                                  | 3.6%                               | 20.5%                                   | 1.4%                               |
| STAT 3            |                                                                         |                                    |                                         |                                    |
| 10-fold threshold | 60,732 (53,675-68,716)                                                  |                                    | 18.5%                                   |                                    |
| 3-fold threshold  | 62,898 (55,094-71,807)                                                  | 3.6%                               | 19.8%                                   | 7.4%                               |
| STAT 4            |                                                                         |                                    |                                         |                                    |
| 10-fold threshold | 102,739 (88,932-118,689)                                                |                                    | 21.6%                                   |                                    |
| 3-fold threshold  | 104,828 (90,612-121,273)                                                | 2.0%                               | 21.9%                                   | 1.0%                               |
| STAT 5            |                                                                         |                                    |                                         |                                    |
| 10-fold threshold | 166,755 (140,966-197,261)                                               |                                    | 25.3%                                   |                                    |
| 3-fold threshold  | 168,140 (142,860-197,892)                                               | 0.8%                               | 24.5%                                   | 3.1%                               |

As described in the text, there was a small proportion of billed items with extreme units and/or charges, exaggerating the standardized costs. In this instance, the standardized cost was replaced with the estimate from the cost-to-charge ratio method. In choosing the threshold for what was considered “extreme”, a prior study utilized a difference of greater than 3-fold between the standardized cost and cost-to-charge ratio method. We examined varying thresholds including 3-, 5-, 10-, and 20-fold, and felt that a 3-fold threshold was too stringent, impacting a high proportion of billed items in this cohort (23% overall) that may not represent true coding errors or other coding issues but rather actual clinically plausible values. Our final methods used a 10-fold threshold, which impacted 6% of total billed items and appeared to address obvious extreme outliers without being too aggressive. In sensitivity analyses, we compared the 3-fold to the 10-fold threshold, and the choice of threshold did not appear to have an important impact on our results.

As displayed in the table, there was a <5% difference in the median value and coefficient of variation across all STAT categories with the exception of a slightly larger difference in the coefficient of variation for STAT category 3 (18.5% with a 10-fold threshold and 19.8% with a 3-fold threshold, percent difference = 7.4%).

**Appendix. Sensitivity Analysis Comparing Alternative Cost Distributions to the Lognormal Distribution Used in the Analysis**

| Group                       | Coefficient of Variation (%) |                   |       |
|-----------------------------|------------------------------|-------------------|-------|
|                             | Lognormal                    | Negative Binomial | Gamma |
| Cost-to-charge ratio method | 24.9%                        | 26.1%             | 25.8% |
| Standardized cost method    | 19.9%                        | 20.0%             | 19.9% |

The table displays minimal differences in the hospital-level coefficient of variation comparing the lognormal to negative binomial and gamma distributions. This was true both for the cost-to-charge ratio and standardized cost method.

### Appendix. Characteristics of Hospitals Changing Resource Use Tertiles

| Variable                   | No change<br>N=29 | Changed by one<br>tertile<br>N=11 | Changed by two<br>tertiles<br>N=3 | p-value |
|----------------------------|-------------------|-----------------------------------|-----------------------------------|---------|
| Children's hospital type   |                   |                                   |                                   |         |
| Freestanding               | 22 (75.9%)        | 10 (90.9%)                        | 3 (100.0%)                        | 0.55    |
| Hospital within a hospital | 7 (24.1%)         | 1 (9.1%)                          | 0 (0.0%)                          |         |
| Geographic region          |                   |                                   |                                   |         |
| Northeast                  | 3 (10.3%)         | 3 (27.3%)                         | 0 (0.0%)                          | 0.14    |
| South                      | 9 (31.0%)         | 5 (45.4%)                         | 1 (33.3%)                         |         |
| West                       | 9 (31.0%)         | 0 (0.0%)                          | 2 (66.67%)                        |         |
| Midwest                    | 8 (27.6%)         | 3 (27.3%)                         | 0 (0.0%)                          |         |
| Surgical volume            | 250 (155-326)     | 251 (206-339)                     | 315 (294-397)                     | 0.36    |
| Payer mix                  |                   |                                   |                                   |         |
| Government                 | 53.6%             | 52.9%                             | 47.5%                             | 0.87    |
| Private                    | 37.8%             | 36.3%                             | 45.3%                             | 0.85    |
| Other                      | 7.6%              | 5.5%                              | 15.1%                             | 0.33    |

Characteristics of hospitals who did not change, changed by one tertile, or changed by two tertiles for resource use when using the cost-to-charge ratio methods vs. standardized cost methods. Note with regard to location, all hospitals included are characterized as urban (vs. rural).
